# Supplementary material for: A Saponification Method for Chlorophyll Removal from Microalgae Biomass as Oil Feedstock
Source: MDPI journal article supplement (doi:10.3390/md14090162), 2016-09-07
Supplement: s1 [file s1]

## Supplementary Materials: A Saponification Method for Chlorophyll Removal from Microalgae Biomass as Oil Feedstock

Tao Li, Jin Xu, Hualian Wu, Guanghua Wang, Shikun Dai, Jiewei Fan, Hui He and Wenzhou Xiang

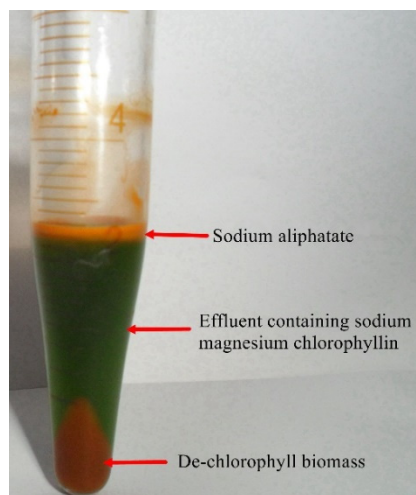

**Figure S1.** Biomass treated with saponification reagent (ethanol-NaOH).
